# Supplementary material for: Kinked Carotids
Source: Atypon-hosted journal article supplement (doi:10.1056/nejmicm0901403), 2010-02-03

## Supplementary Appendix

This appendix has been provided by the authors to give readers additional information about their work.

Supplement to: Rosenthal RL, Grimsley BR. Kinked carotids. *N Engl J Med* 2010;362:448.

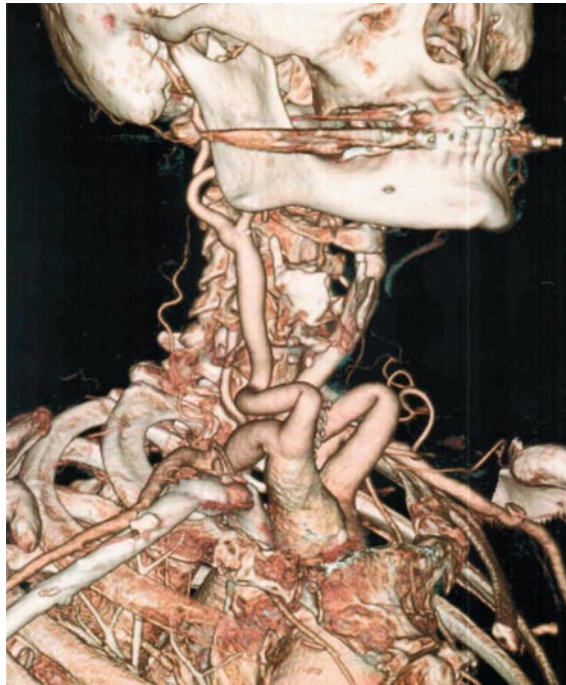

Supplement: nejm_rosenthal_448sa1.pdf [file nejm_rosenthal_448sa1.pdf]
